# Supplementary material for: A facile synthesis of Ru/N–C as an efficient and cost-effective electrocatalyst for hydrogen evolution
Source: Royal Society of Chemistry journal article supplement (doi:10.1039/d0nj01227k), 2020-01-01
Supplement: d0nj01227k1.pdf [file d0nj01227k1.pdf]

## Supporting Information

### **Facile synthesis of Ru/N-C as an efficient and cost-effective electrocatalyst for hydrogen evolution**

Zichuang Li,<sup>a, b</sup> Yu Pei,<sup>b, c</sup> Qiangjian Ju,<sup>b, c</sup> Beibei Guo,<sup>b, c</sup> Yifan Hu,<sup>b, c</sup> Qian Liu,<sup>b, c</sup>  
Yufang Zhu<sup>\*, a, b</sup> and Jiacheng Wang<sup>\*, b, c</sup>

a School of Materials Science and Engineering, University of Shanghai for Science and Technology, 516 Jungong Road, Shanghai 200093, PR China

b State Key Laboratory of High Performance Ceramics and Superfine Microstructure, Shanghai Institute of Ceramics, Chinese Academy of Sciences, 1295 Dingxi Road, Shanghai 200050, PR China

c University of Chinese Academy of Sciences, 19A Yuquan Rd, Shijingshan District 100049 Beijing, PR China

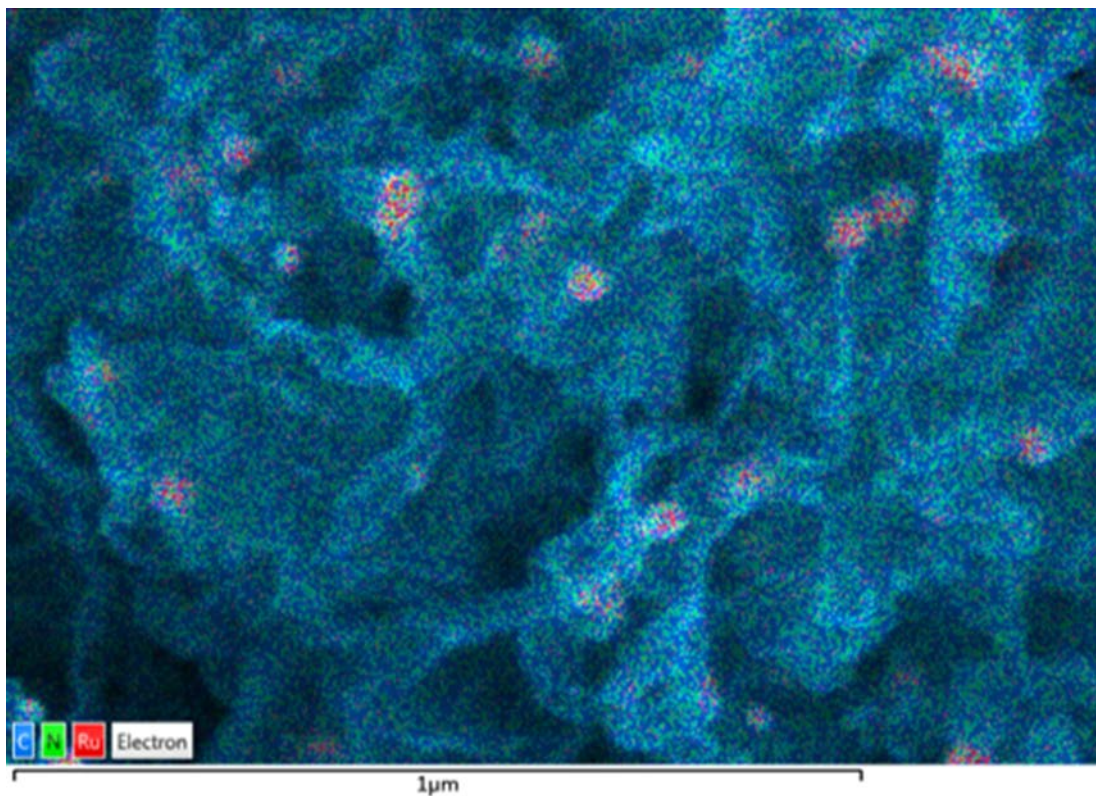

Figure S1. Image of Ru-N-C-6% after superimposing the of element mapping.

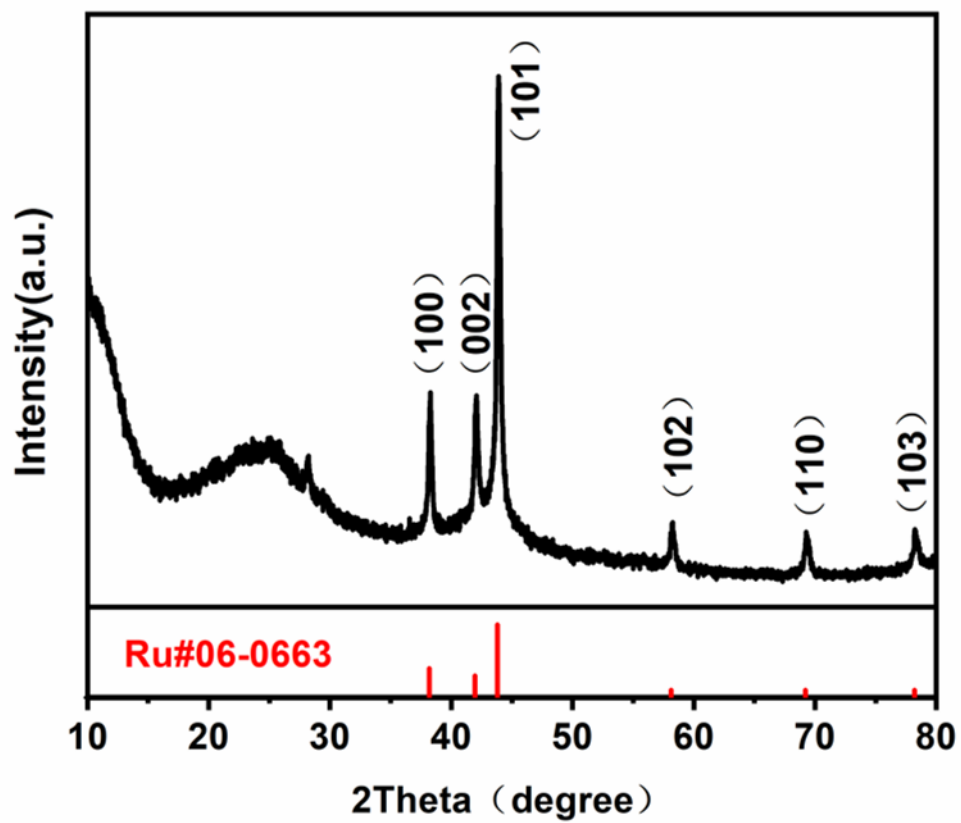

Figure S2. XRD of Ru-N-C-6%.

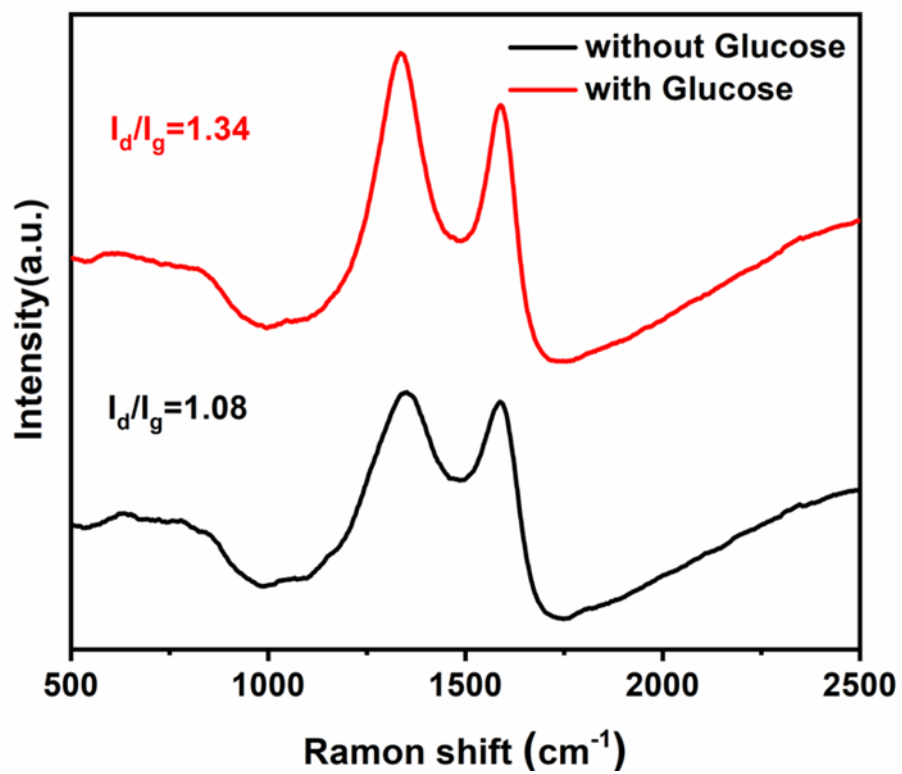

Figure S3. Raman of Ru-N-C-6% with glucose or without glucose.

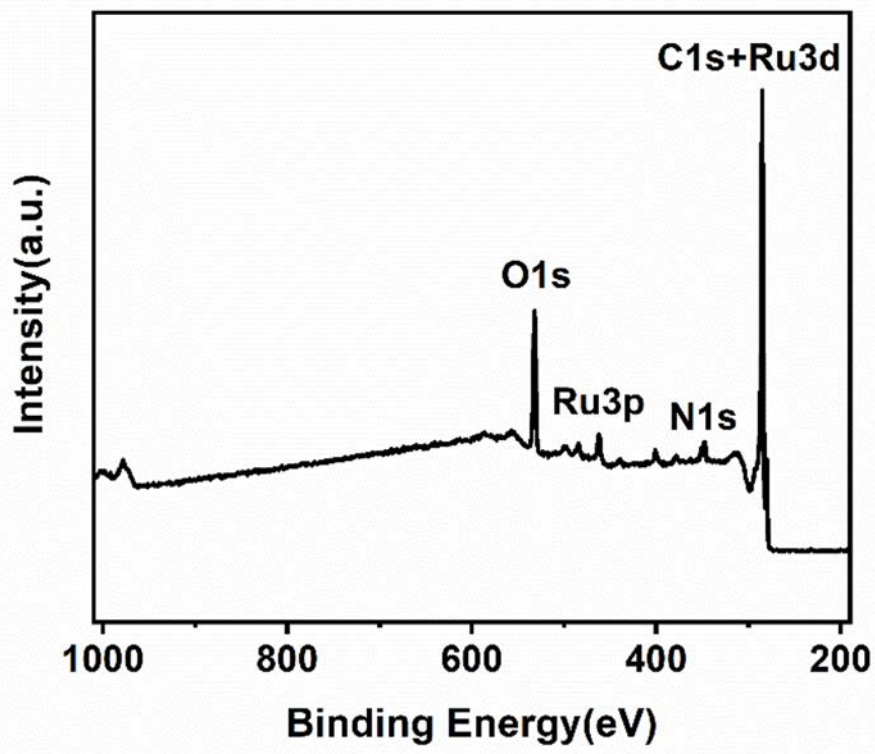

Figure S4. XPS of Ru-N-C-6%.

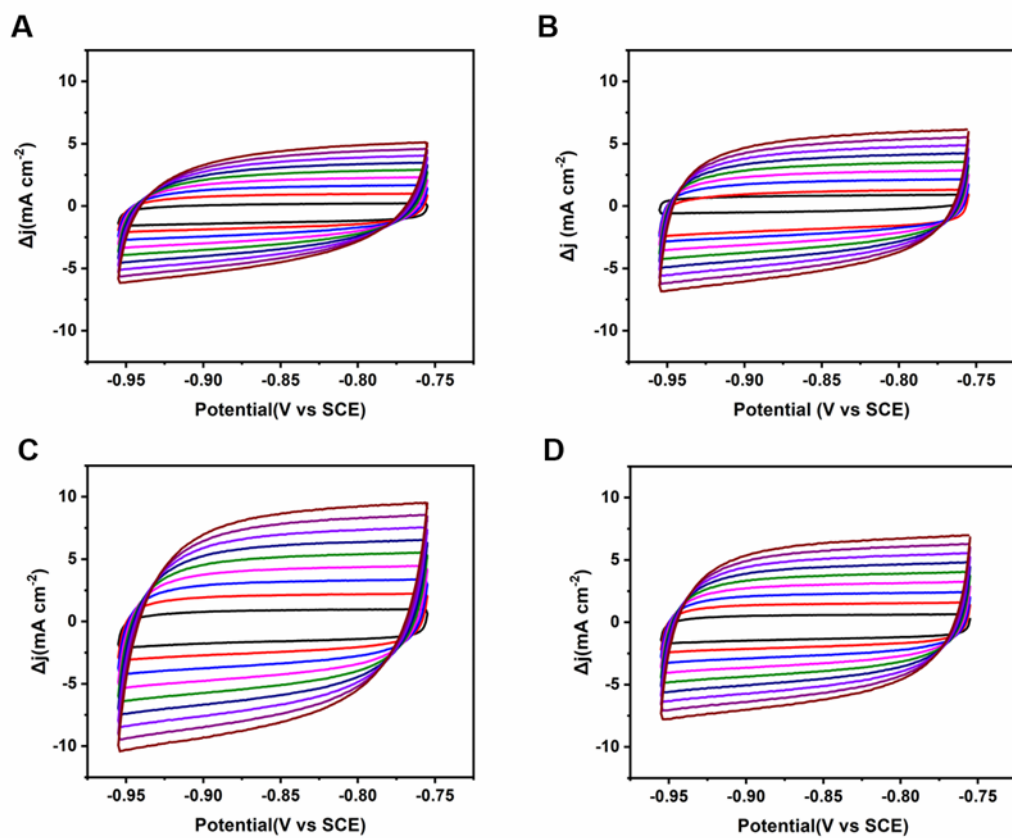

Figure S5. (A) SCV of Ru-N-C-2%. (B) SCV of Ru-N-C-4%. (C) SCV of Ru-N-C-6%. (D) SCV of Ru-N-C-8%.

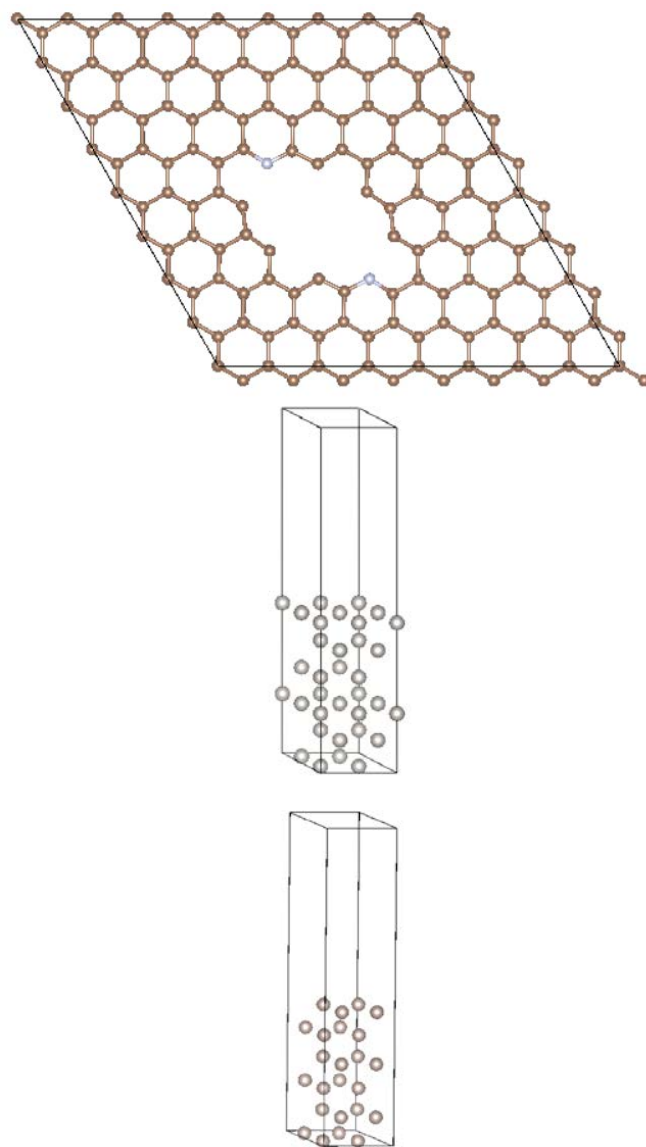

Figure S6. Other models used to calculate HER free energy, N-C(top), Pt(mid), and Ru(bottom)

Table S1 elements contents of Ru-N-C-6% from XPS

| <b>Elements</b> | <b>Contents</b> |
|-----------------|-----------------|
| Ru 3p           | 4.26%           |
| C 1s            | 86.96%          |
| N 1s            | 2.86%           |
| O 1s            | 5.92%           |



Table S2 Overpotentials of HER electrocatalysts at 10 mA cm<sup>-2</sup> in 1 M KOH

| <b>samples</b>        | <b>Overpotential(mV)</b> | <b>Ref.</b>                                    |
|-----------------------|--------------------------|------------------------------------------------|
| Ru-N/C                | 34                       | This work                                      |
| CDs/Pt-PANI           | 56                       | Appl. Catal. B-Environ. 2019, 257, 117905      |
| A-CoPt-NC             | 50                       | Angew. Chem. Int. Ed. 2019, 58, 9404-9408      |
| NiRu@NC               | 34                       | J. Mater. Chem. A 2018, 6, 1376-1381           |
| Rh@CTF                | 57                       | J. Mater. Chem. A 2019, 7, 11934-11943         |
| Ru-TiO <sub>2</sub>   | 150                      | Angew. Chem. Int. Ed., 2020, 59 (4), 1718-1726 |
| RuP <sub>2</sub> @NPC | 52                       | Angew. Chem. Int. Ed., 2020, 59 (4), 1718-1726 |
| Porous Ru             | 83                       | Angew. Chem. Int. Ed., 2020, 59 (4), 1718-1726 |
| Cu <sub>2-x</sub> @Ru | 80                       | Angew. Chem. Int. Ed., 2020, 59 (4), 1718-1726 |
